# Supplementary material
Source: PubMed Central journal article supplement (PMC11028365)
Supplement: 262_2019_2386_MOESM1_ESM.pdf [file 262_2019_2386_MOESM1_ESM.pdf]

**a**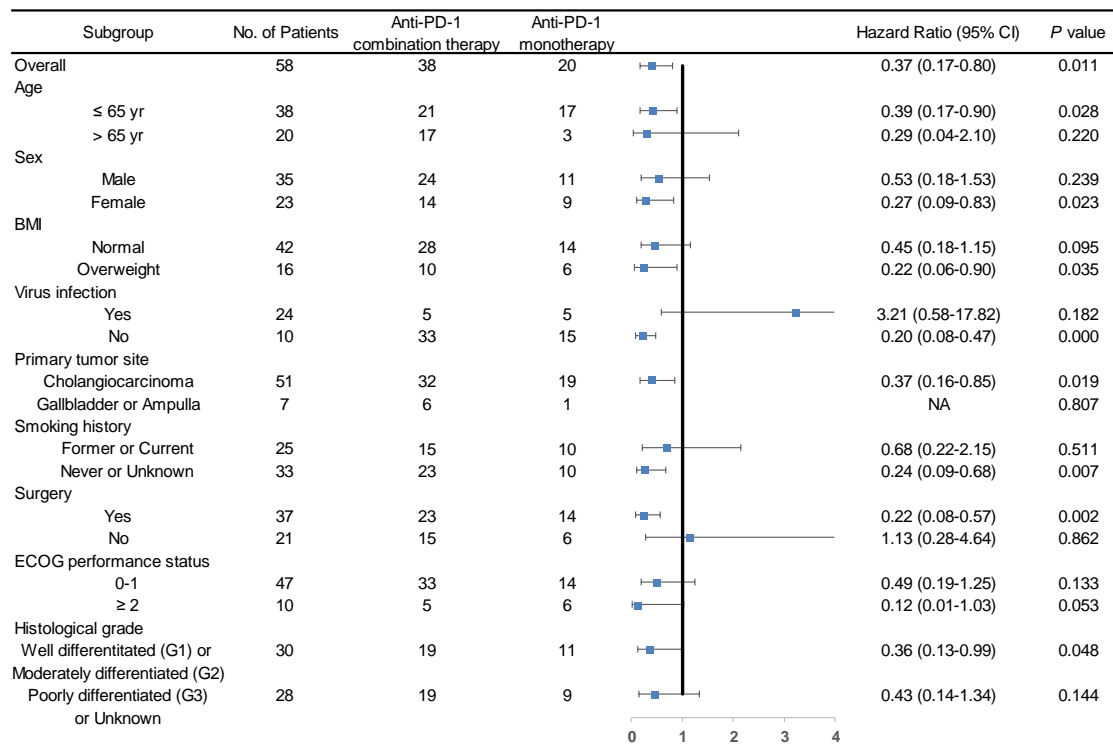**b**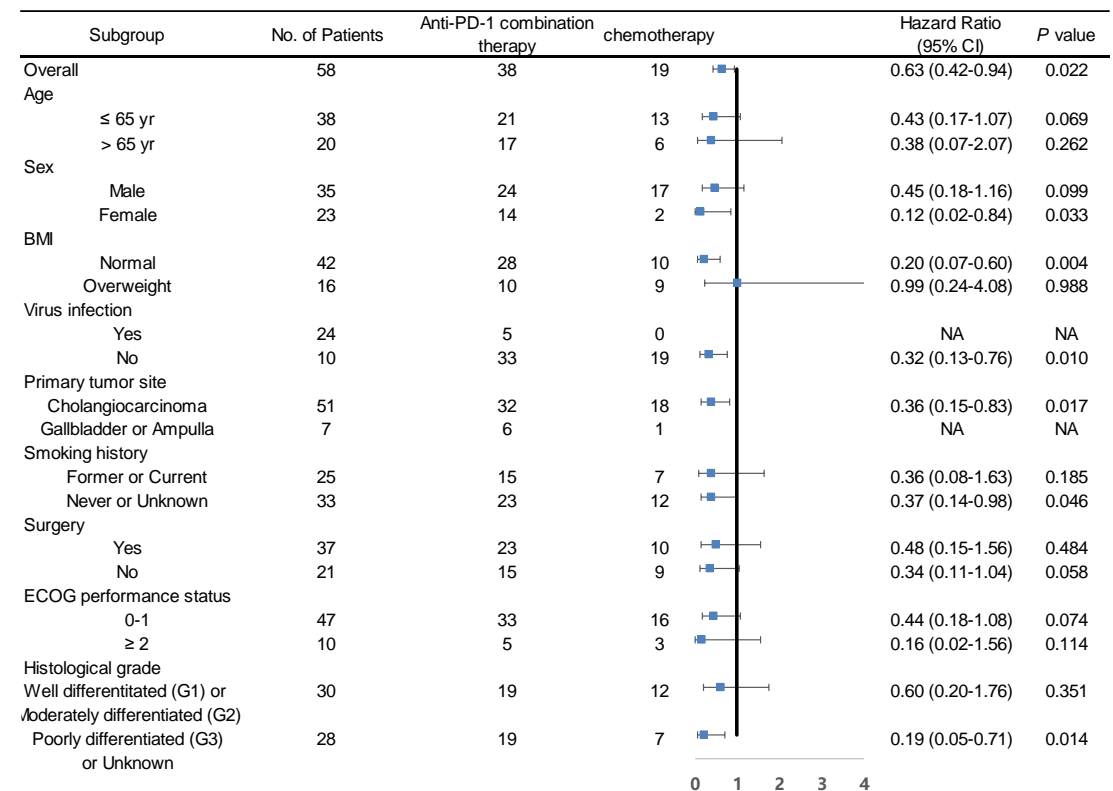

Supplementary Figure S1. Forest plots of overall survival in patient subgroups. Subgroup analysis of overall survival between patients in anti-PD-1 combination group and monotherapy group (a) or between patients in anti-PD-1 combination therapy group and chemotherapy group (b).

**Supplementary Table S1 Treatment received by patients in the anti-PD-1 combination, monotherapy and chemotherapy group.**

| Patient                            | Drug                                  | Cycle | Patient    | Drug                                  | Cycle |
|------------------------------------|---------------------------------------|-------|------------|---------------------------------------|-------|
| <b>Anti-PD-1 combination group</b> |                                       |       |            |                                       |       |
| Patient 1                          | nivolumab + gemcitabine               | 5     | Patient 20 | nivolumab + S-1                       | 1     |
| Patient 2                          | nivolumab + paclitaxel-albumin        | 5     | Patient 21 | pembrolizumab + oxaliplatin + tegafur | 6     |
| Patient 3                          | pembrolizumab + paclitaxel-albumin    | 4     | Patient 22 | nivolumab + gemcitabine + cisplatin   | 3     |
| Patient 4                          | pembrolizumab + gemcitabine           | 1     | Patient 23 | nivolumab + gemcitabine + cisplatin   | 3     |
| Patient 5                          | pembrolizumab + oxaliplatin + tegafur | 4     | Patient 24 | nivolumab + gemcitabine + cisplatin   | 8     |
| Patient 6                          | nivolumab + paclitaxel-albumin + S-1  | 16    | Patient 25 | nivolumab + gemcitabine + cisplatin   | 6     |
| Patient 7                          | nivolumab + gemcitabine               | 4     | Patient 26 | nivolumab + gemcitabine + cisplatin   | 4     |
| Patient 8                          | nivolumab + S-1                       | 2     | Patient 27 | nivolumab + gemcitabine + cisplatin   | 8     |
| Patient 9                          | nivolumab + gemcitabine + cisplatin   | 8     | Patient 28 | nivolumab + gemcitabine + cisplatin   | 6     |
| Patient 10                         | nivolumab + gemcitabine + cisplatin   | 6     | Patient 29 | nivolumab + gemcitabine + cisplatin   | 4     |
| Patient 11                         | nivolumab + gemcitabine + cisplatin   | 2     | Patient 30 | nivolumab + gemcitabine + cisplatin   | 2     |
| Patient 12                         | nivolumab + paclitaxel-albumin        | 6     | Patient 31 | nivolumab + gemcitabine + cisplatin   | 5     |
| Patient 13                         | nivolumab + gemcitabine + cisplatin   | 4     | Patient 32 | nivolumab + gemcitabine + cisplatin   | 3     |
| Patient 14                         | pembrolizumab + docetaxel             | 2     | Patient 33 | nivolumab + gemcitabine + cisplatin   | 4     |
| Patient 15                         | pembrolizumab + S-1                   | 3     | Patient 34 | nivolumab + gemcitabine + cisplatin   | 6     |
| Patient 16                         | nivolumab + S-1                       | 3     | Patient 35 | nivolumab + gemcitabine + cisplatin   | 9     |
| Patient 17                         | nivolumab + gemcitabine + cisplatin   | 4     | Patient 36 | nivolumab + gemcitabine + cisplatin   | 3     |
| Patient 18                         | nivolumab + gemcitabine + cisplatin   | 4     | Patient 37 | nivolumab + gemcitabine + cisplatin   | 3     |
| Patient 19                         | nivolumab + gemcitabine + cisplatin   | 4     | Patient 38 | nivolumab + gemcitabine + cisplatin   | 2     |
| <b>Anti-PD-1 monotherapy group</b> |                                       |       |            |                                       |       |
| Patient 1                          | pembrolizumab                         | 6     | Patient 11 | pembrolizumab                         | 1     |
| Patient 2                          | pembrolizumab                         | 1     | Patient 12 | nivolumab                             | 7     |
| Patient 3                          | nivolumab                             | 18    | Patient 13 | nivolumab                             | 1     |
| Patient 4                          | nivolumab                             | 2     | Patient 14 | nivolumab                             | 5     |
| Patient 5                          | nivolumab                             | 2     | Patient 15 | nivolumab                             | 1     |
| Patient 6                          | nivolumab                             | 1     | Patient 16 | nivolumab                             | 2     |
| Patient 7                          | pembrolizumab                         | 1     | Patient 17 | nivolumab                             | 1     |
| Patient 8                          | nivolumab                             | 3     | Patient 18 | nivolumab                             | 7     |
| Patient 9                          | nivolumab                             | 6     | Patient 19 | pembrolizumab                         | 2     |
| Patient 10                         | nivolumab                             | 3     | Patient 20 | pembrolizumab                         | 5     |
| <b>Chemotherapy group</b>          |                                       |       |            |                                       |       |
| Patient 1                          | gemcitabine + S-1                     | 1     | Patient 11 | gemcitabine + cisplatin               | 2     |
| Patient 2                          | gemcitabine + carboplatin             | 3     | Patient 12 | gemcitabine + cisplatin               | 2     |
| Patient 3                          | oxaliplatin + tegafur                 | 1     | Patient 13 | paclitaxel-albumin + cisplatin        | 5     |
| Patient 4                          | gemcitabine + S-1                     | 2     | Patient 14 | gemcitabine + capecitabine            | 2     |
| Patient 5                          | oxaliplatin + tegafur                 | 1     | Patient 15 | paclitaxel-albumin + S-1              | 2     |
| Patient 6                          | gemcitabine + S-1                     | 1     | Patient 16 | gemcitabine + cisplatin               | 6     |
| Patient 7                          | paclitaxel-albumin + S-1              | 4     | Patient 17 | gemcitabine + S-1                     | 2     |
| Patient 8                          | gemcitabine + cisplatin               | 2     | Patient 18 | gemcitabine + capecitabine            | 6     |

---

|            |                                          |   |            |                         |   |
|------------|------------------------------------------|---|------------|-------------------------|---|
| Patient 9  | S-1                                      | 6 | Patient 19 | gemcitabine + cisplatin | 8 |
| Patient 10 | paclitaxel-albumin +<br>cyclophosphamide | 2 |            |                         |   |

---
